# Supplementary material for: Clinical relevance of serum antibodies to extracellular N-methyl-d-aspartate receptor epitopes
Source: PubMed Central journal article supplement (PMC6055984; doi:10.1136/jnnp-2014-308736), 2014-09-22
Supplement: NIHMS78483-supplement-Supplementary_data.pdf [file NIHMS78483-supplement-Supplementary_data.pdf]

**Supplementary Table 1. Clinical features of 56 NMDAR antibody-positive patients**

| <i>Case number</i>                                        | <i>Age, sex</i> | <i>NMDAR-Ab CBA scores</i><br><br>(Paired serum (1:20), CSF (1:1), days since first sample)<br><br>(approximate length of history prior to antibody testing, months (m)) | <i>Clinical syndrome</i>                                                                              | <i>Investigations</i>                                                       | <i>Final clinical diagnosis</i>                                               | <i>Response to treatment</i>                     | <i>Primary autoimmune likelihood (follow up, months (m))</i> |
|-----------------------------------------------------------|-----------------|--------------------------------------------------------------------------------------------------------------------------------------------------------------------------|-------------------------------------------------------------------------------------------------------|-----------------------------------------------------------------------------|-------------------------------------------------------------------------------|--------------------------------------------------|--------------------------------------------------------------|
| Definite paraneoplastic (listed by NMDAR-Ab first sample) |                 |                                                                                                                                                                          |                                                                                                       |                                                                             |                                                                               |                                                  |                                                              |
| 1                                                         | 17 F            | 4, 4 (na)                                                                                                                                                                | Protracted encephalitis requiring intensive care unit stay (censored data).                           | CSF unknown; EEG slowing, rhythmic delta and occasional spikes; MRI normal. | NMDAR-Ab encephalitis; teratoma (found on oophorectomy)                       | No; (steroids, PEX, IVIG) (died of bowel sepsis) | Definite paraneoplastic (14m)                                |
| 2                                                         | 21 F            | 4, (3.5, CSF1.5, 6m), 4 (na)                                                                                                                                             | Headaches, hallucinations, confusional state, movement disorder, dysautonomia, seizures, dyskinesias. | CSF unknown; EEG encephalopathic; MRI normal                                | NMDAR-Ab encephalitis; ovarian teratoma; post mortem CA4 encephalitic changes | Yes (tumour removal, IVIG, steroids, rituximab). | Definite paraneoplastic (9m) died                            |
| 3<br>Included in Irani et al 2010                         | 32 F            | 4, 4, 1.5 (0m)                                                                                                                                                           | Psychosis, seizures, coma, rhythmic movements                                                         | CSF normal; EEG slowing; MRI normal                                         | NMDAR-Ab encephalitis; ovarian teratoma                                       | Yes (steroids, PEX, tumour removal)              | Definite paraneoplastic (55m)                                |

|                                                                |      |                               |                                                                                                                                                                                                                   |                                                                               |                                                                      |                                                                     |                                             |
|----------------------------------------------------------------|------|-------------------------------|-------------------------------------------------------------------------------------------------------------------------------------------------------------------------------------------------------------------|-------------------------------------------------------------------------------|----------------------------------------------------------------------|---------------------------------------------------------------------|---------------------------------------------|
| 4                                                              | 25 F | 4, 4 (1m)                     | Behavioural change, seizures, coma, movement disorder                                                                                                                                                             | CSF normal; EEG episodic anterior slow discharges; MRI normal                 | NMDAR-Ab encephalitis; ovarian teratoma                              | Yes (IVIg, PEX, tumour removal, steroids, rituximab)                | Definite paraneoplastic (3m)                |
| 5<br>Case 1 in Davies et al. 2010 <sup>17</sup>                | 20 F | 4, 2.5 (na)                   | Behaviour change, seizures, encephalopathy, dyskinesias. Intubated for several months. Previous (contralateral) teratoma removed 24m earlier.                                                                     | CSF 74 Lymphs, 6 PMNs; OCB; EEG epileptiform then encephalopathic; MRI normal | NMDAR-Ab encephalitis; previous and new ovarian teratoma             | Yes (steroids, tumour removal, PEX).                                | Definite paraneoplastic (10m)               |
| 6                                                              | 29 F | 4 (na)                        | Psychosis, encephalopathy, seizures.                                                                                                                                                                              | CSF 57 WCC; EEG slowing; MRI normal                                           | NMDAR-Ab encephalitis; ovarian teratoma                              | Yes (tumour removal, PEX)                                           | Definite paraneoplastic (27m)               |
| 7<br>Case 6 in Davies et al. 2010 <sup>17</sup>                | 22 F | 3, 3 (na)                     | Forgetfulness then headaches, fever and confusional state, seizures and coma, dysautonomia, dystonia. Positive ANA and anti-Ro antibodies, anti-dsDNA negative. Reactivation of TB on therapy, protracted course. | CSF 8 lymphs; OCB; EEG encephalopathic; MRI normal                            | NMDAR-Ab encephalitis; bilateral ovarian teratomas                   | Yes (teratoma removal, steroids, IVIg, cyclophosphamide, rituximab) | Definite paraneoplastic (56m)               |
| 8                                                              | 25 F | (3, CSF 1, 40d), 4, 1.5 (na)  | Encephalitis with initial psychosis, catatonia, dystonia then coma.                                                                                                                                               | CSF 21 lymphs; EEG slow triphasic waves, encephalopathic; MRI normal          | NMDAR-Ab encephalitis; ovarian teratoma and papillary thyroid cancer | Yes (IVIg, PEX, steroids, removal of tumours)                       | Definite paraneoplastic (24m)               |
| 9<br>Zandi et al 2009 <sup>16</sup> , Irani et al <sup>2</sup> | 48 M | 2, (2, CSF 1, not clara) (0m) | Amnesic syndrome, seizures, relapsed Hodgkin lymphoma ('Ophelia syndrome')                                                                                                                                        | CSF 4 WCCs; then 10 lymphs; EEG normal; MRI medial temporal lobe high signal  | Hodgkin lymphoma associated limbic encephalitis (Ophelia)            | Yes (PEX)                                                           | Definite paraneoplastic (6m) but died later |

|                                                                |      |           |                                                                                                                                              |                                                                                                                    |                                        |                                             |                    |
|----------------------------------------------------------------|------|-----------|----------------------------------------------------------------------------------------------------------------------------------------------|--------------------------------------------------------------------------------------------------------------------|----------------------------------------|---------------------------------------------|--------------------|
|                                                                |      |           |                                                                                                                                              |                                                                                                                    | syndrome)                              |                                             |                    |
| Definite (non-paraneoplastic, listed by NMDAR-Ab first sample) |      |           |                                                                                                                                              |                                                                                                                    |                                        |                                             |                    |
| 10                                                             | 21 F | 4, 3 (na) | Psychosis, apraxia, behavioural change, seizures                                                                                             | CSF 29 WCC, OCB; EEG encephalopathic, MRI normal then meningeal lesions                                            | NMDAR-Ab encephalitis; no tumour found | Yes (steroids, plasmapheresis, IVIG, AZA)   | Definite (35m)     |
| 11                                                             | 23 F | 4, 4 (na) | Psychosis, seizures, dystonia, autonomic dysfunction. No follow up.                                                                          | CSF OCB, EEG slowing, MRI normal                                                                                   | NMDAR-Ab encephalitis; no tumour found | Yes (PEX, steroids)                         | Definite (2m)      |
| 12                                                             | 40 F | 4, 0 (na) | Behavioural disturbance, musical hallucinations, seizure, encephalopathy, movement disorder. Cardiac asystole.                               | CSF 13 WCC, OCB; EEG slowing, MRI few areas white matter high signal                                               | NMDAR-Ab encephalitis; no tumour found | Yes (corticosteroids, IVIG)                 | Definite (40m)     |
| 13<br>Case 2 in Davies et al. 2010 <sup>17</sup>               | 41 M | 4,3 (1m)  | Behaviour change, hallucinations, seizures, coma, dysautonomia, rhythmic orofacial and limb movements, hyperthermia                          | CSF normal but then 40 WCC (95% lymph), raised protein and OCB.; EEG epileptiform then encephalopathic; MRI normal | NMDAR-Ab encephalitis; no tumour found | No (Steroids, IVIG x 2, plasmapheresis x 2) | Definite (6m) died |
| 14<br>Case 3 in Davies et al. 2010 <sup>17</sup>               | 29 M | 3, 1.5    | Behaviour change and seizures, auditory hallucinations, delusions, coma and dyskinesias. Prolonged rehabilitation, now in sheltered housing. | CSF 12 WCC; transient positive HSV1, OCB. EEG slow, MRI normal                                                     | NMDAR-Ab encephalitis; no tumour found | Yes, (steroids, plasmapheresis, rituximab)  | Definite (49m)     |

|                                                  |      |                                         |                                                                                                                 |                                                                                  |                                                                                                        |                                            |                     |
|--------------------------------------------------|------|-----------------------------------------|-----------------------------------------------------------------------------------------------------------------|----------------------------------------------------------------------------------|--------------------------------------------------------------------------------------------------------|--------------------------------------------|---------------------|
| 15                                               | 22 F | (2, CSF1, 0d), 2.5, 1.5 (na)            | Behaviour change, amnesia, movement disorder. Relapses late 2012.                                               | CSF 20 WCC; EEG focal temporal and occipital changes; MRI normal                 | NMDAR-Ab encephalitis; no tumour found                                                                 | Yes (IVIG, PEX, rituximab, AZA)            | Definite (uk)       |
| 16                                               | 16 F | 2.5, 3, 1 (2m)                          | Musical hallucinations, seizures, cerebellar syndrome (subsequent relapsing cognitive and psychiatric symptoms) | CSF normal; EEG high amplitude slow waves and spikes, MRI normal                 | NMDAR-Ab encephalitis; no tumour found                                                                 | Yes (steroids, PEX, IVIG, rituximab)       | Definite (58m)      |
| 17<br>Case 5 in Davies et al. 2010 <sup>17</sup> | 26 F | 2 (na)                                  | Headache, acute confusion, memory loss and word finding difficulties, athetoid then rhythmic movements.         | CSF 114 WCC; EEG encephalopathic; MRI normal                                     | NMDAR-Ab encephalitis; no tumour search.                                                               | Yes (Steroids, IVIG)                       | Definite (24m)      |
| 18<br>Case 4 in Davies et al. 2010 <sup>17</sup> | 28 F | 2 (na)                                  | Headache, fever, agitation, hallucinations, seizures, dyskinesias.                                              | CSF 60 lymphs; OCB; EEG encephalopathic, one seizure; MRI normal then WM lesions | NMDAR-Ab encephalitis; no tumour search                                                                | Yes (steroids)                             | Definite (48m)      |
| 19*                                              | 26 F | 1.5, (2.5, CSF1.5, 25d), 4, 2.5 (~1 m). | Behaviour change, hallucinations, movement disorder                                                             | CSF Lymphocytic; EEG encephalopathic; MRI possible frontal ischaemia             | NMDAR-Ab encephalitis; no tumour found at oophorectomy. Remains dependent in nursing residential care. | Yes (steroids, IVIG, PEX, rituximab, AZA)  | Definite (18m)      |
| 20*                                              | 33 F | 1.5, (1, CSF0, 40d), 2.5 (na)           | Headache, seizures, coma, dysautonomia                                                                          | CSF not known; EEG sharp waves; MRI normal                                       | NMDAR-Ab encephalitis; no tumour found                                                                 | Yes (steroids, IVIG, rituximab)            | Definite (uk)       |
| 21                                               | 68 M | 1.5, 1 (14m)                            | Seizures, amnesia, cerebellar and bradykinesia, coeliac                                                         | CSF normal, EEG borderline theta; MRI atrophy and                                | Post mortem Alzheimer's Disease type                                                                   | Yes (PEX, steroids), then deteriorates and | Definite (20m) then |

|                                                                                |      |                                 |                                                                                                                         |                                                                                 |                                                                                   |                                                         |                                                |
|--------------------------------------------------------------------------------|------|---------------------------------|-------------------------------------------------------------------------------------------------------------------------|---------------------------------------------------------------------------------|-----------------------------------------------------------------------------------|---------------------------------------------------------|------------------------------------------------|
|                                                                                |      |                                 | disease, subsequent dementia                                                                                            | periventricular WM high signal                                                  | pathology and basal ganglia and hippocampal encephalitic changes; no tumour found | dies                                                    | died                                           |
| 22*                                                                            | 46 M | (1.5, CSF0, 0d), (0, CSF0) (8m) | Complex partial seizures, amnesia. Ankylosing spondylitis and previous anti-TNF therapy (adalimumab)                    | CSF normal, EEG left temporal slowing, MRI high signal left temporal lobe       | NMDAR-Ab encephalitis (post anti-TNF); no tumour found                            | Yes (steroids, PEX)                                     | Definite (40m)                                 |
| 23                                                                             | 57 F | 1.5 (1m)                        | Confusion and delusions, psychosis, catatonia, orofacial dyskinesia                                                     | CSF 225 lymph; OCB; EEG no epileptic activity; MRI, few areas of WM high signal | NMDAR-Ab encephalitis; no tumour found                                            | Yes (PEX, steroids MMF)                                 | Definite (11m)                                 |
| 24                                                                             | 18 M | 1, 0, CSF0 (1m)                 | Psychosis, insomnia, headache, agitation, then sustained remission                                                      | CSF 22 WCC; EEG, MRI normal                                                     | NMDAR-Ab psychosis; no tumour found                                               | Yes (IVMP)                                              | Definite (9m)                                  |
| 25                                                                             | 44 M | 1, (0, CSF0 5m), 0 (11m)        | Cerebellar syndrome, with asymmetric myoclonus, dyspraxia and bradykinesia of right arm, memory problems                | CSF raised protein, OCBs; EEG, MRI normal                                       | NMDAR-Ab encephalitis; no tumour found                                            | Yes (PEX)                                               | Definite (7m)                                  |
| Possible (paraneoplastic; non-paraneoplastic, listed by NMDAR-Ab first sample) |      |                                 |                                                                                                                         |                                                                                 |                                                                                   |                                                         |                                                |
| 26                                                                             | 65 F | 1(2m)                           | Seizures, head jerks, cognitive impairment, rheumatoid arthritis, non-small cell lung adenocarcinoma subsequently found | CSF normal; EEG slow; MRI normal                                                | Localisation related seizures; non-small cell lung cancer                         | Not tried (possible spontaneous resolution of symptoms) | Possible paraneoplastic (22m) died two m later |
| 27                                                                             | 79 M | 1 (2m)                          | Weight loss, encephalopathy, agitation and unsteadiness.                                                                | CSF 34 lymphs; EEG frontal slowing; MRI                                         | No diagnosis made in life;                                                        | Not tried                                               | Possible paraneoplastic                        |

|    |      |                              |                                                                                                                                         |                                                                                                                                     |                                                                           |                                                                                                         |                         |
|----|------|------------------------------|-----------------------------------------------------------------------------------------------------------------------------------------|-------------------------------------------------------------------------------------------------------------------------------------|---------------------------------------------------------------------------|---------------------------------------------------------------------------------------------------------|-------------------------|
|    |      |                              |                                                                                                                                         | non-specific WM changes                                                                                                             | oesophagus mass; prostate adeno-carcinoma                                 |                                                                                                         | (0m) died               |
| 28 | 22 F | 4, 4, 4 (na)                 | Headache, fatigue, hypersomnolence, fever, coma. Initial working diagnosis of neuro-Behçet's disease.                                   | CSF 30 WCC; EEG slow with some sharp features; MRI normal initially except transverse and sinus thrombosis. Later MTL inflammation  | NMDAR-Ab encephalitis and venous sinus thrombosis; no tumour found        | No (Steroids, infliximab, methotrexate; plasma exchange and rituximab following NMDAR antibody result). | Possible (7m)           |
| 29 | 80 F | 4, 4, 1.5 (3m).              | Behavioural change and facial dyskinesia (3m). Two years of depression, received electroconvulsive therapy.                             | CSF and EEG nd; MRI normal                                                                                                          | Depression; no tumour search                                              | No (steroids)                                                                                           | Possible (0m)           |
| 30 | 52 F | 4, 2.5, 1.5 (12m)            | Encephalitis, seizures, myeloradiculopathy. Chronic seizures and cognitive impairment.                                                  | CSF 34 WCC, raised protein, OCB, ACE raised; EEG slowing; MRI signal change T6 to conus, cerebellar haemorrhage                     | Biopsy proven neurosarcoidosis with systemic sarcoidosis; no tumour found | Not tried (already on steroids and methotrexate for sarcoid)                                            | Possible (no follow-up) |
| 31 | 33 M | 2.5(na)                      | Relapsing encephalitis in youth. Mild fluctuating psychiatric symptoms since then. Antibodies tested when well.                         | CSF 12 WCC in 1996 (counted in this analysis); EEG nd; MRI normal                                                                   | Idiopathic encephalitis and psychiatric syndrome; no tumour search        | Not tried (relevance unclear, mild symptoms)                                                            | Possible (44m)          |
| 32 | 67 M | 2, (1.5, CSF0 22m), 2.5 (0m) | Porencephalic cyst, longstanding schizophrenia. Episode of delirium. (0m) (Relapse with seizures 1 year later, and further seizures and | CSF, EEG and MRI nd at presentation; EEG discharges at first relapse and slow at second, CSF cellular 1 <sup>st</sup> relapse, with | Localisation related seizures and chronic schizophrenia; no tumour        | Not tried (spontaneous resolution)                                                                      | Possible (28m)          |

|     |      |                    |                                                                                                                                                      |                                                                                       |                                                      |                                                 |                                                              |
|-----|------|--------------------|------------------------------------------------------------------------------------------------------------------------------------------------------|---------------------------------------------------------------------------------------|------------------------------------------------------|-------------------------------------------------|--------------------------------------------------------------|
|     |      |                    | possible stroke at 22 months)                                                                                                                        | MRI high signal right hemisphere at 22 months.                                        | found.                                               |                                                 |                                                              |
| 33* | 22 M | 1.5 (0m)           | Acute psychosis: visual and auditory hallucinations with cannabis (0m) Childhood generalised seizures.                                               | CSF, EEG nd;MRI normal                                                                | First episode psychosis; no tumour search            | Not tried; (lost to follow up)                  | Possible (no follow-up)                                      |
| 34  | 26 F | 1.5, 2.0, 1.5 (2m) | Relapsing psychosis                                                                                                                                  | CSF and EEG normal; MRI subtle increased signal cingulate, insular and hippocampi     | First episode psychosis; no tumour found             | Yes (steroids then olanzapine)                  | Possible (13m)                                               |
| 35  | 39 M | 1.5, 2.5, 1 (14m)  | Paroxysmal hyperkinetic movement disorder, cognitive dysfunction and subsequent psychiatric symptoms                                                 | CSF normal; EEG intermittent slowing; MRI normal                                      | No clear diagnosis made; no tumour found             | No; (steroids only)                             | Possible (no response but only given steroids; no follow-up) |
| 36  | 68 M | 1.5, 1 (0m)        | Spontaneously rapidly resolving acute encephalitis with confusion and poor communication post respiratory infection                                  | CSF 120 PMNs, 20 lymphs, raised protein;EEG slowing;MRI probable small vessel disease | Possible NMDAR-Ab encephalitis; no tumour found      | Not tried (spontaneously recovers)              | Possible (6m)                                                |
| 37* | 56 F | 1.5 (1m)           | Acute mania                                                                                                                                          | CSF nd; EEG and MRI normal                                                            | Manic episode; no tumour search                      | Not tried; (lost to follow up)                  | Possible (no follow-up)                                      |
| 38* | 54 M | 1.5, 2, 1 (60m)    | 5 years progressive difficulty using right arm, and gait disturbance. Myoclonus and pyramidal signs. Stimulus sensitive jerky tremor. Polycythaemia. | CSF normal tau and abeta; EEG nd; MRI atrophy and small vessel disease                | Possible corticobasal degeneration; no tumour search | Not tried (not felt to be relevant at the time) | Possible (0m)                                                |
| 39  | 33 M | 1, 2.5 (84m)       | Refractory localisation related epilepsy. Encephalitis                                                                                               | CSF 38 WCC; EEG normal; MRI                                                           | Hippocampal sclerosis; no                            | Not tried                                       | Possible                                                     |

|                                                                         |      |                                           |                                                                                                                                                                                        |                                                                                             |                                             |                                       |                    |
|-------------------------------------------------------------------------|------|-------------------------------------------|----------------------------------------------------------------------------------------------------------------------------------------------------------------------------------------|---------------------------------------------------------------------------------------------|---------------------------------------------|---------------------------------------|--------------------|
|                                                                         |      |                                           | considered in admission 6 years prior to this presentation (fever, amnesia)                                                                                                            | hippocampal sclerosis                                                                       | tumour found                                |                                       | (27m)              |
| 40                                                                      | 56 M | <i>I, 1.5, (0.5, CSF0 2.3y)</i><br>(144m) | Recurrent partial seizures and epilepsy partialis continua, and increasing frequency of seizures over 12 years. Tremor.                                                                | CSF raised protein; EEG L hemispheric slowing; MRI progressive hemiatrophy                  | Rasmussen's encephalitis; no tumour found   | No (steroids, PEX, AZA)               | Possible (46m)     |
| 41                                                                      | 48 M | <i>I, 0</i> (0m)                          | Post respiratory tract infection relapsing encephalitis (fluctuating drowsiness, spontaneous resolution). (0m) Antibodies not measured in first episode 6 years prior to this episode. | CSF 20 WCC, raised protein; EEG nd; MRI normal                                              | Idiopathic encephalitis; no tumour found    | Not tried (spontaneous resolution)    | Possible (9m)      |
| 42                                                                      | 62 M | <i>I</i> (0m)                             | Abdominal pain then seizures, hyponatraemia. (0m) Epilepsy for 4 years, recent bowel surgery for pseudomembranous colitis (5 m prior)                                                  | CSF normal; EEG asymmetrical with sharp features; MRI atrophy                               | No diagnosis made in life; no tumour search | Not tried; (result not known in life) | Possible (0) died  |
| 43                                                                      | 71 F | <i>I</i> (3m)                             | Seizures requiring sedation (3m)                                                                                                                                                       | CSF normal; EEG epileptiform; MRI high signal MTL, left parietal lobe haemorrhage           | Diagnosis not made in life; no tumour found | No (steroids)                         | Possible (4m) died |
| Unlikely (remaining cases, listed by tumour then NMDAR-Ab first sample) |      |                                           |                                                                                                                                                                                        |                                                                                             |                                             |                                       |                    |
| 44*                                                                     | 77 M | <i>1.5</i>                                | Cerebellar syndrome (6m)                                                                                                                                                               | CSF and EEG nd; MRI posterior fossa mass                                                    | Glioma; died; no autopsy                    | Not tried; DEX only                   | Unlikely (2m) died |
| 45                                                                      | 72 M | <i>(2.5, CSF0, 0)</i><br>(30m)            | 2.5 years of amnesia suggestive of mild Alzheimer's disease, isolated generalised seizure, few                                                                                         | Small IgG kappa 12g/L paraprotein. CSF slightly raised protein (scored normal); EEG nd; MRI | Alzheimer's disease; no tumour found        | Not tried                             | Unlikely (26m)     |



|    |      |                 |                                                                                                                                                                                                    |                                                                                               |                                                                      |                                                                 |                |
|----|------|-----------------|----------------------------------------------------------------------------------------------------------------------------------------------------------------------------------------------------|-----------------------------------------------------------------------------------------------|----------------------------------------------------------------------|-----------------------------------------------------------------|----------------|
|    |      |                 | episodes of deja vu. Deep vein thrombosis                                                                                                                                                          | normal                                                                                        | found                                                                |                                                                 |                |
| 46 | 28 M | 2               | Probable relapsing cerebral vasculitis, first episode with parenchymal haemorrhage 6 years prior, progressive infarcts and narrowing medium sized vessels on angiography despite immunosuppression | CSF 146 lymph; EEG n.d., MRI WM ischaemia.                                                    | CNS vasculitis; no tumour found                                      | n/a (partial effect - cyclophosphamide, steroids, azathioprine) | Unlikely (31m) |
| 47 | 17 M | 1.5, 0 (60m)    | Subacute ataxia and jerky nystagmus; known maple syrup urine disease (MSUD) without biochemical evidence of decompensation (1m)                                                                    | CSF, EEG, MRI normal                                                                          | Probable exacerbation of maple syrup urine disease; no tumour search | Not tried (spontaneously improves)                              | Unlikely (13m) |
| 48 | 63 M | 1.5 (40m)       | Focal seizures and migraine                                                                                                                                                                        | CSF normal; EEG L epileptiform focus; MRI normal                                              | Cryptogenic epilepsy; no tumour found                                | Not tried                                                       | Unlikely (0m)  |
| 49 | 67 M | 1, 3, 1.5 (48m) | Cognitive dysfunction and complex partial epilepsy                                                                                                                                                 | CSF normal; EEG intermittent slowing L temporal; MRI mild atrophy (scored normal in analysis) | Possible early Alzheimer's Disease; no tumour found                  | Not tried                                                       | Unlikely (37m) |
| 50 | 33 M | 1, 1, 0 (10m)   | Motor neuron disease. Upper limb weakness and cramps, initially thought to be multifocal motor neuropathy                                                                                          | CSF OCBs; EEG and MRI nd                                                                      | Motor neurone disease; no tumour found                               | No (IVIg)                                                       | Unlikely (51m) |
| 51 | 45 F | 1, 0, 0 (60m)   | Migraine, small meningioma, malaise, anti-purkinje antibody weak positive, Raynaud's phenomenon,                                                                                                   | CSF, EEG and MRI normal                                                                       | No clear diagnosis made; no                                          | Not tried                                                       | Unlikely (23m) |

|    |      |                   |                                                                                                                                                        |                                                                                                  |                                                                   |           |                |
|----|------|-------------------|--------------------------------------------------------------------------------------------------------------------------------------------------------|--------------------------------------------------------------------------------------------------|-------------------------------------------------------------------|-----------|----------------|
|    |      |                   | bipolar disease, previous possible temporal lobe epilepsy. Subsequent loss of antibody                                                                 |                                                                                                  | tumour found                                                      |           |                |
| 52 | 49 F | <i>I</i> (na)     | Depression, mutism, previous possible systemic lupus erythematosus and polymyositis.                                                                   | CSF and EEG normal; MRI non-specific WM signal (normal in analysis)                              | Depression                                                        | n/a (AZA) | Unlikely (0m)  |
| 53 | 49 F | <i>I</i> (13m).   | Progressive cerebellar syndrome                                                                                                                        | CSF and EEG normal; MRI cerebellar, peduncle and pontine volume loss                             | Idiopathic late onset cerebellar ataxia; no tumour found          | Not tried | Unlikely (18m) |
| 54 | 52 M | <i>I</i> (na)     | 3 years of a frontal dementing illness, self-neglect, disinhibition. Father had a late onset Parkinsonian syndrome with similar brain imaging findings | CSF normal; EEG some slowing; MRI confluent WM change                                            | Probable leukodystrophy , genetics undetermined; no tumour search | Not tried | Unlikely (1m)  |
| 55 | 55 F | <i>I, O</i> (30m) | Stiffness, difficulty walking, startle, pyramidal signs, eventual bulbar involvement. (30m)                                                            | CSF normal; EEG unknown; MRI normal                                                              | Upper motor neuron predominant motor neurone disease              | No (PEX)  | Unlikely (18m) |
| 56 | 57 M | <i>I</i> (120m)   | Recurrent focal seizures over 10 years, previous aneurysmal subarachnoid haemorrhage 43 years prior.                                                   | CSF normal; EEG L frontotemporal discharges; CT L temporal lobe volume loss with aneurysm clips. | Refractory epilepsy                                               | Not tried | Unlikely (48m) |

Cases #27, 42, and 43 died before the information about the antibody was available and their likelihood was assigned by the authors.

Abbreviations: AZA azathioprine; ACE angiotensin converting enzyme; CSF cerebrospinal fluid; DEX dexamethasone; EEG electroencephalogram; HSV1 herpes simplex virus 1; IVIG intravenous immunoglobulin; L left; lymphs lymphocytes; MRI magnetic resonance imaging; MSUD maple syrup urine disease; **na not available**; nd not done; OCB oligoclonal bands seen in CSF; PEX plasmapheresis; PMN

polymorphonuclear leukocytes; uk unknown; WCC white cell count; WM white matter. \*The NMDAR-Ab scores at first sampling (1.5) were reported as positive in seven patients, before this value was re-designated as Low Positive. In cases with more than three longitudinal scores the 1<sup>st</sup> serum CBA score and last CBA score are given, with the maximum CBA score given if not one of the former, and a maximum of one CSF paired score is given if available.
